# Supplementary material
Source: publisher figshare collection journal article supplement (https://brill.figshare.com/ndownloader/files/22461827)

**Tree rubbing by Asian black bears (*Ursus thibetanus*) in  
conifer plantations in Okutama Mountain in Japan**

**Yoh Ogawa<sup>1,\*</sup>, Kahoko Tochigi<sup>2</sup>, Tomoko Naganuma<sup>2</sup>, Bainah Sari  
Dewi<sup>3</sup> and Shinsuke Koike<sup>2,4</sup>**

<sup>1</sup> Tokyo Metropolitan Agricultural High School, 1-10-2 Kotobuki, Fuchu 183-0056, Japan

<sup>2</sup> Graduate School of Agriculture, Tokyo University of Agriculture and Technology, 3-5-8 Saiwai, Fuchu  
183-8509, Japan

<sup>3</sup> Tropical Biodiversity Research and Development Center, University of Lampung, Bandar Lampung  
35145, Indonesia

<sup>4</sup> Institute of Global Innovation Research, Tokyo University of Agriculture and Technology, 3-5-8  
Saiwai, Fuchu 183-8509, Japan

Submitted: August 8, 2019. Final revision received: February 3, 2020. Accepted: March 25, 2020

\*<sup>1</sup> Corresponding author; e-mail: onwogawa@mac.com

**Supplementary material**

**Figure S1.** Individually identified bears other than the bears in fig. 2.

October 2011

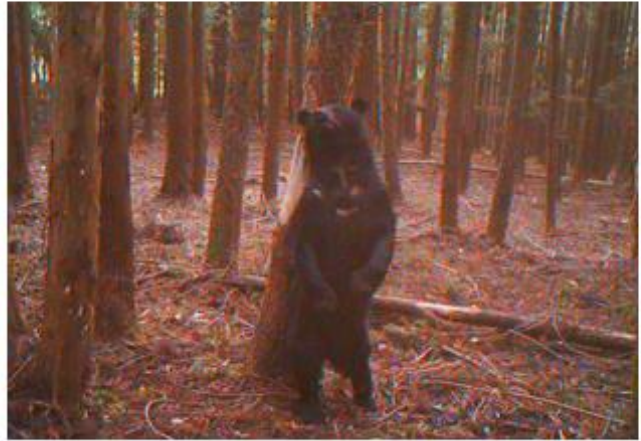

May 2013

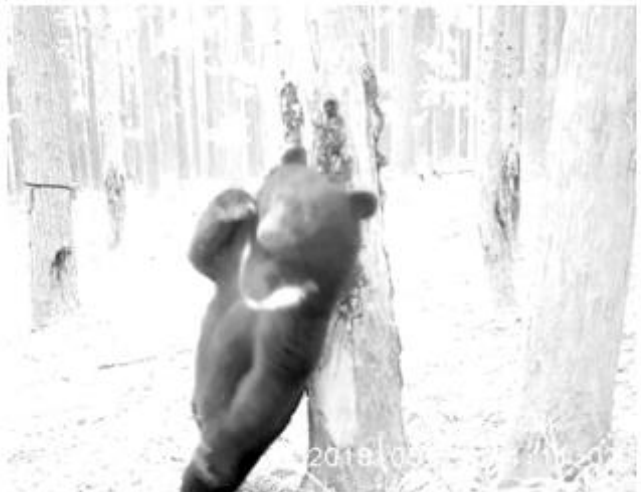

July 2015

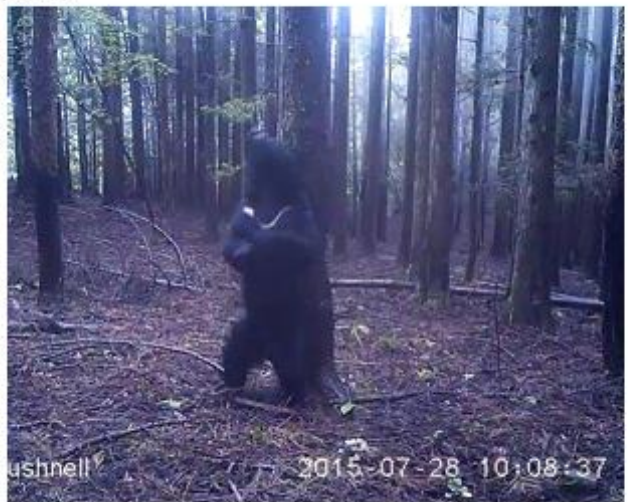

Supplement: Supplementary file 1 [file 22461827]
